# Supplementary material for: The Effects of Mental Imagery with Video-Modeling on Self-Efficacy and Maximal Front Squat Ability
Source: MDPI journal article supplement (doi:10.3390/sports4020023), 2016-04-14
Supplement: s1 [file s1]

# Supplementary Materials: The Effects of Mental Imagery with Video-Modeling on Self-Efficacy and Maximal Front Squat Ability

Daniel J. M. Buck, Jasmin C. Hutchinson, Christa R. Winter and Brian A. Thompson

## Warm-Up Protocol

Self Myofascial Release (20 s each)

- Calves
- Quadriceps
- Hamstrings
- Gluteals

Static Stretching (20 s each)

- Quadriceps
- Hamstring
- Gluteals

Activation & Supplemental

- Alternate Leg Lower × 5 each leg
- Glute Bridge March × 5 each leg
- Cook Squat × 5

Dynamic (15 yards)

- Knee Hug Lunge
- Quad Walk w/Reach
- Figure 4
- Spiderman Walk
- RDL Walk
- Straight Leg Kick

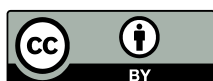

© 2016 by the authors; licensee MDPI, Basel, Switzerland. This article is an open access article distributed under the terms and conditions of the Creative Commons by Attribution (CC-BY) license (<http://creativecommons.org/licenses/by/4.0/>).
